# Supplementary material for: A Novel Dye-Modified Metal–Organic Framework as a Bifunctional Fluorescent Probe for Visual Sensing for Styrene and Temperature
Source: MDPI journal article supplement (doi:10.3390/molecules28134919), 2023-06-22
Supplement: s1 [file s1]

# A Novel Dye-Modified Metal–Organic Framework as a Bifunctional Fluorescent Probe for Visual Sensing for Styrene and Temperature

Jie Yang <sup>1</sup>, Chaojun Ren <sup>2</sup>, Min Liu <sup>1</sup>, Wenwei Li <sup>1</sup>, Daojiang Gao <sup>1</sup>, Hongda Li <sup>3</sup> and Zhanglei Ning <sup>1,\*</sup>

<sup>1</sup> College of Chemistry and Materials Science, Sichuan Normal University, Chengdu 610068, China; yangjie\_deyouxiang@163.com (J.Y.); liumin200009@163.com (M.L.); liwenwen202202@163.com (W.L.); daojianggao@sicnu.edu.cn (D.G.)

<sup>2</sup> Beijing Aerospace Propulsion Institute, Beijing 100076, China; rcj\_ustb@163.com

<sup>3</sup> Liuzhou Key Laboratory for New Energy Vehicle Power Lithium Battery, School of Electronic Engineering, Guangxi University of Science and Technology, Liuzhou 545006, China; hdli@gxust.edu.cn

\* Correspondence: zlning@sicnu.edu.cn

## Supporting information

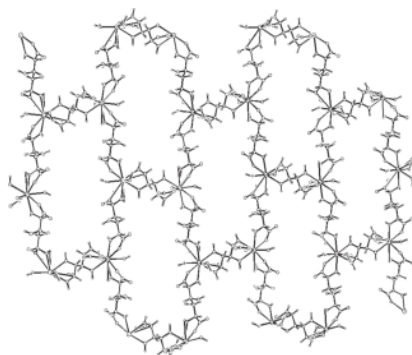

Figure S1 The diagram of the 2D network of Tb-MOFs [27].

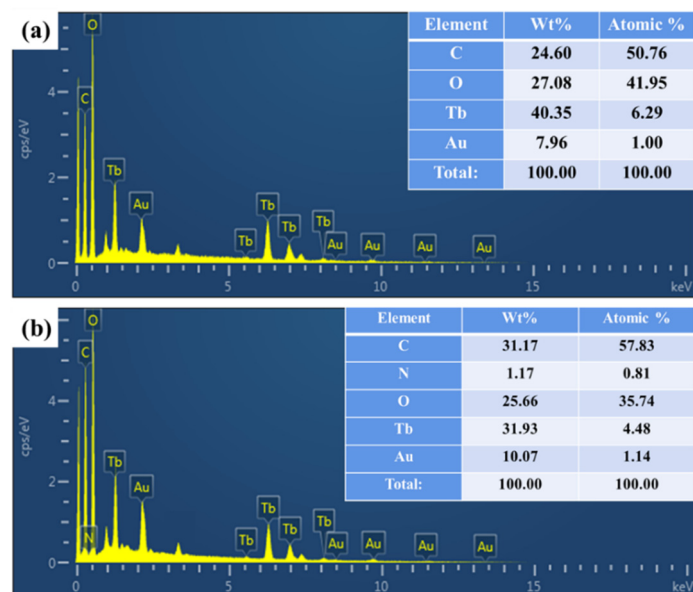

Figure S2 (a) EDX spectrums of Tb-MOFs; (b) EDX spectrums of C460@Tb-MOFs.

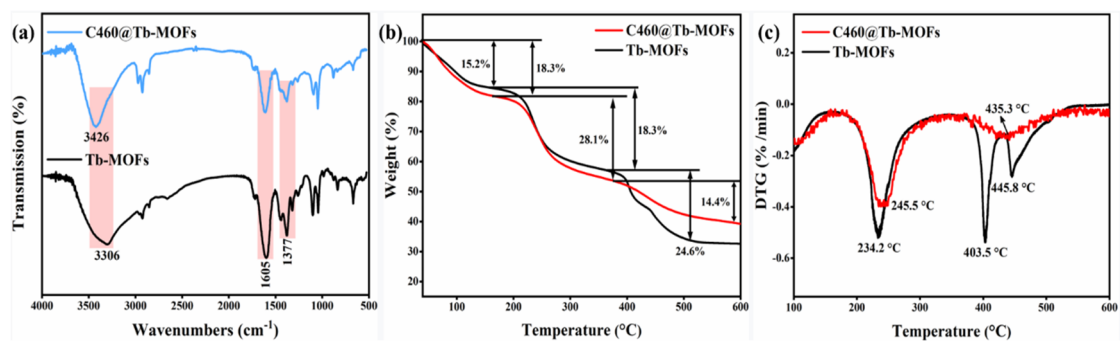

Figure S3 (a) FT-IR spectra of Tb-MOFs and C460@Tb-MOFs; (b) The thermogravimetric curve of Tb-MOFs and C460@Tb-MOFs; (c) The DTG curve of Tb-MOFs and C460@Tb-MOFs.

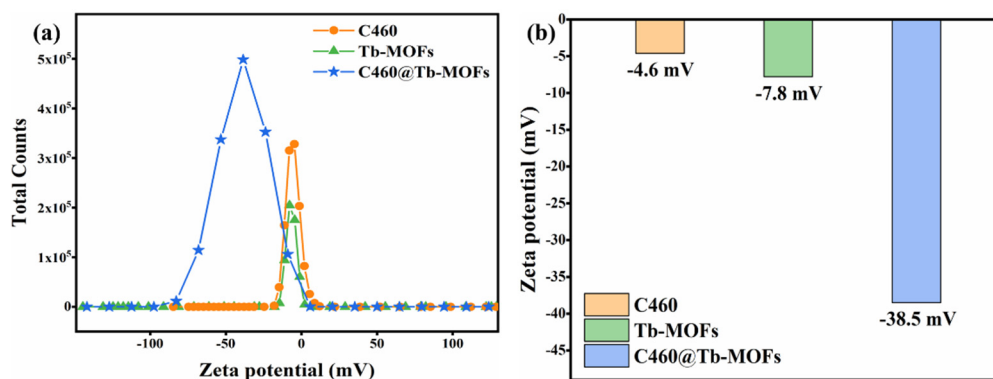

Figure S4 (a) Zeta potential plots of C460, Tb-MOFs and C460@Tb-MOFs; (b) Histograms of zeta potential values of C460, Tb-MOFs and C460@Tb-MOFs.

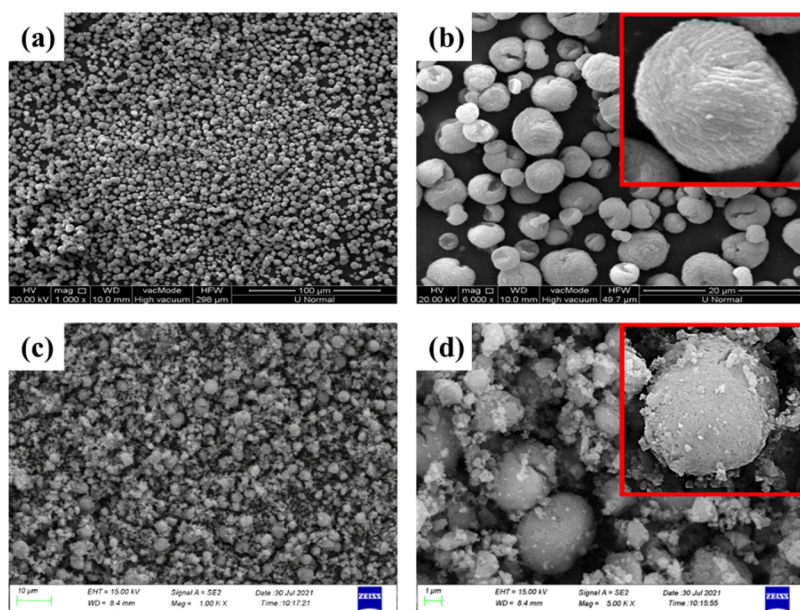

Figure S5 (a) SEM image of Tb-MOFs (low magnification); (b) SEM image of Tb-MOFs (high magnification), inset shows the details at this magnification; (c) SEM image of C460@Tb-MOFs (low magnification); (d) SEM image of C460@Tb-MOFs (high magnification), inset shows the details at this magnification.

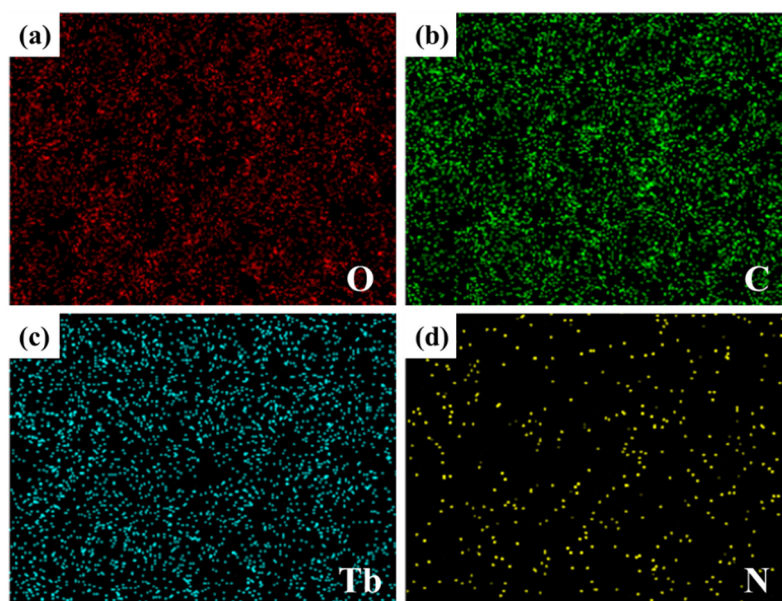

Figure S6 Elemental mapping images of C460@Tb-MOFs: (a) O element; (b) C element; (c) Tb element; (d) N element.

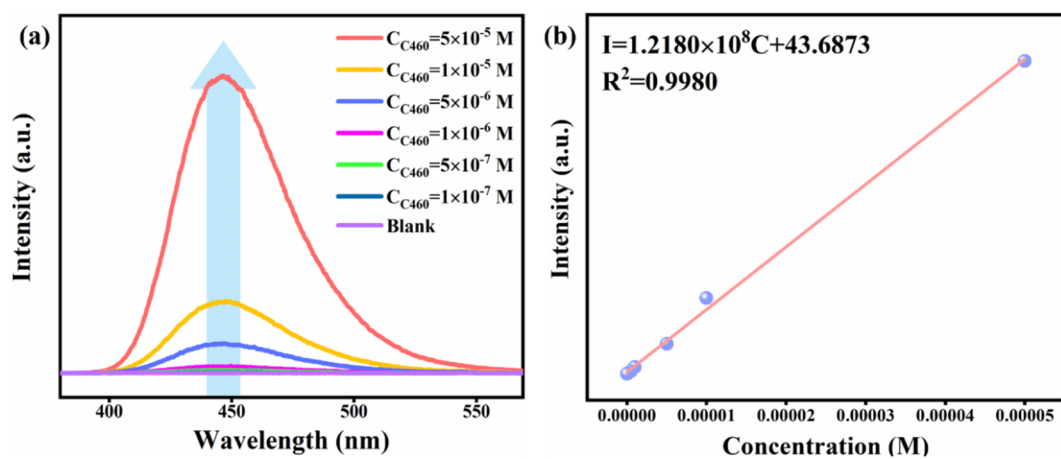

Figure S7 (a) Emission spectra of concentration gradient dye C460; (b) Fitted relationship between C460 luminescence intensity and concentration.



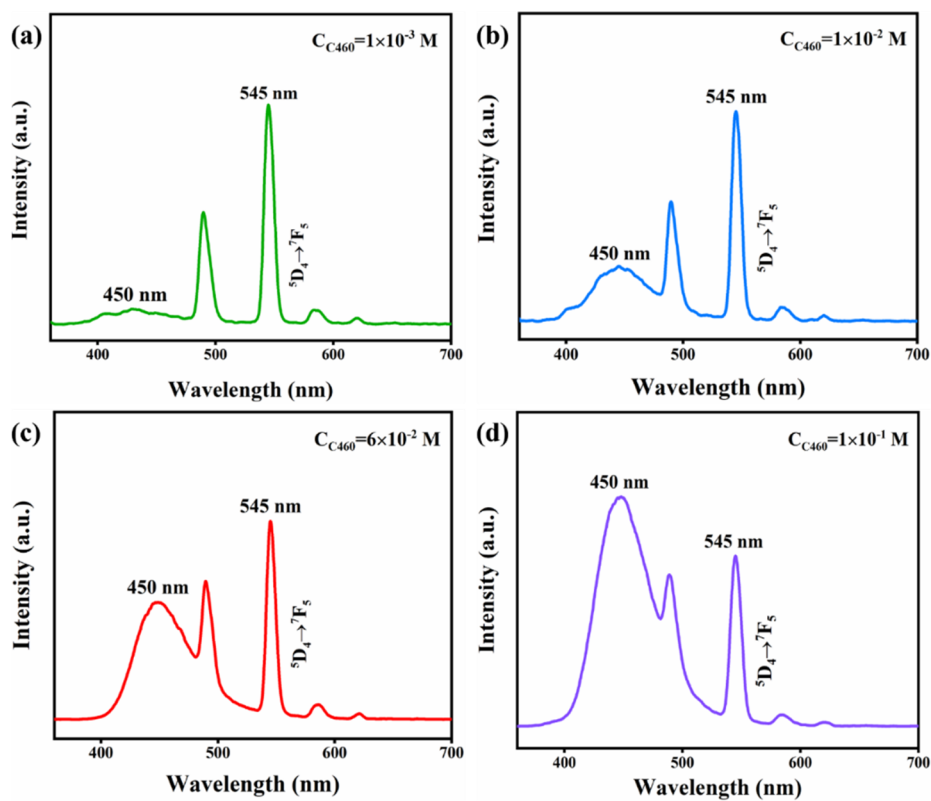

Figure S8 Emission spectra of C460@Tb-MOFs (different concentrations of dye): (a) The concentrations of C460 is  $10^{-3}$  M with 0.004% loading; (b) The concentrations of C460 is  $10^{-2}$  M with 0.034% loading; (c) The concentrations of C460 is  $6 \times 10^{-2}$  M with 0.49% loading; (d) The concentrations of C460 is  $10^{-1}$  M with 0.67% loading.

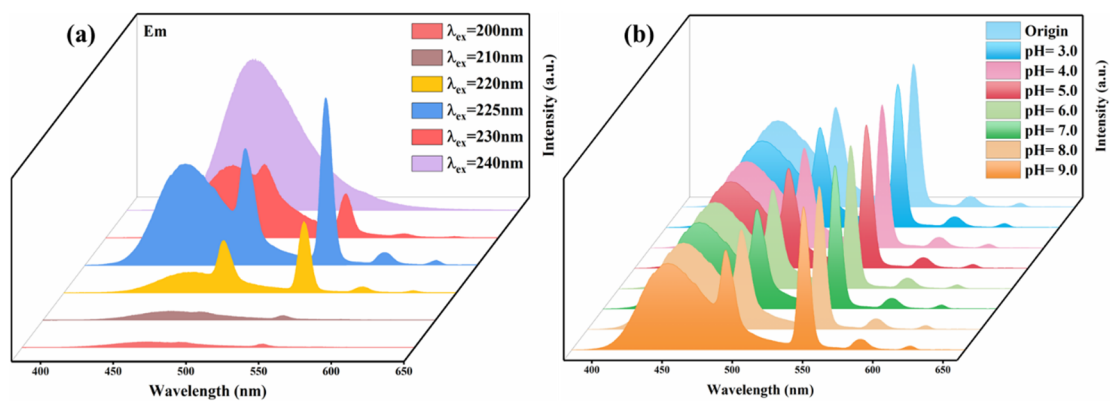

Figure S9 (a) Emission spectra of C460@Tb-MOFs at different excitation wavelengths;  
 (b) Emission spectra of C460@Tb-MOFs in different pH environments.

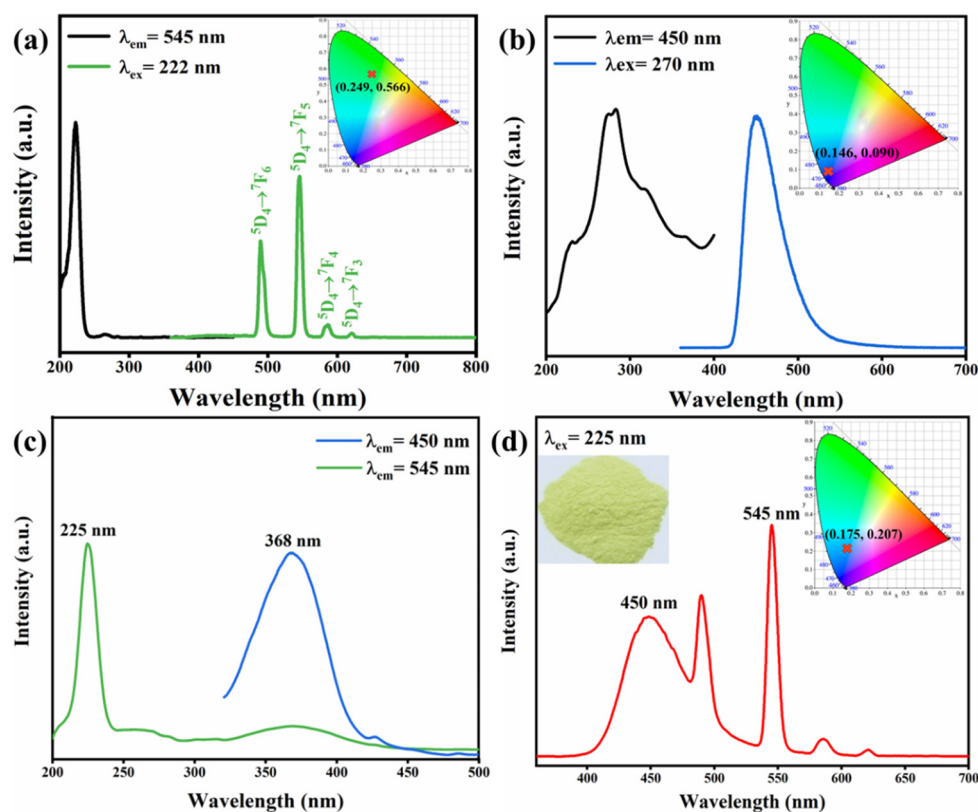

Figure S10 (a) The excitation and emission spectra of Tb-MOFs, inset is CIE chromaticity diagram for the Tb-MOFs; (b) The excitation and emission spectra of C460, inset is CIE chromaticity diagram for the C460; (c) Excitation spectra of C460@Tb-MOFs; (d) Emission spectra of C460@Tb-MOFs, inset is CIE chromaticity diagram for the C460@Tb-MOFs.

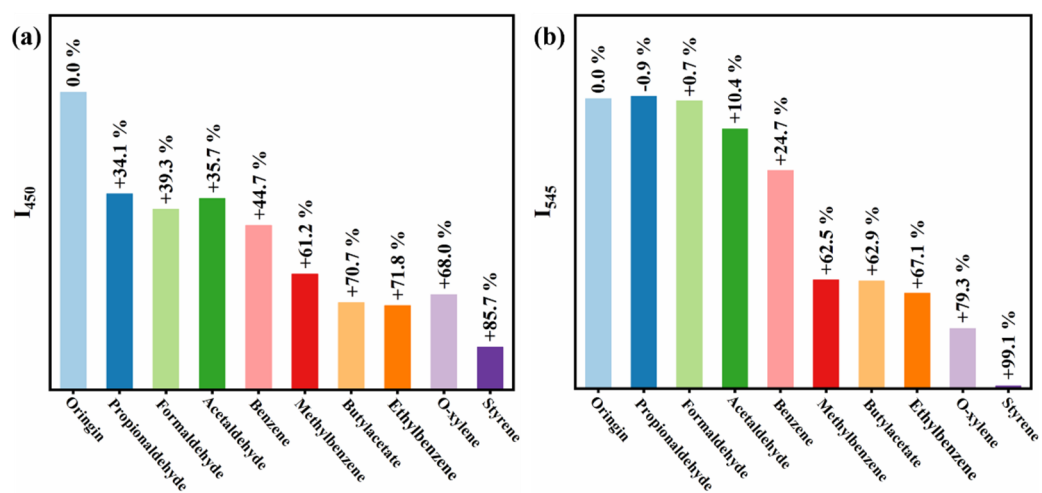

Figure S11 (a) The quenching rates of C460@Tb-MOFs at  $I_{450}$  for different VOCs solutions; (b) The quenching rates of C460@Tb-MOFs at  $I_{545}$  for different VOCs solutions.

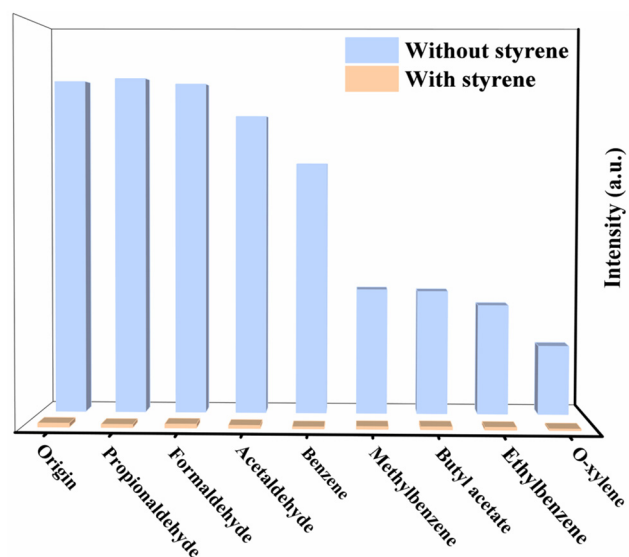

Figure S12 Anti-interference of C460@Tb-MOFs to styrene identification in the context of the presence of other interfering VOCs.

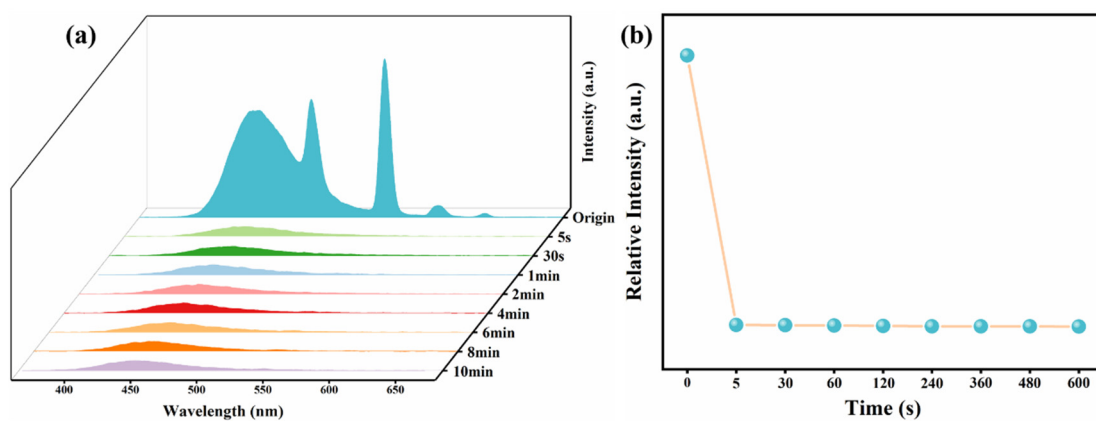

Figure S13 (a) Emission spectra of the time response of styrene detection by C460@Tb-MOFs; (b) Relative intensity ratio ( $I_{545}/I_{450}$ ) versus time for styrene detection by C460@Tb-MOFs.

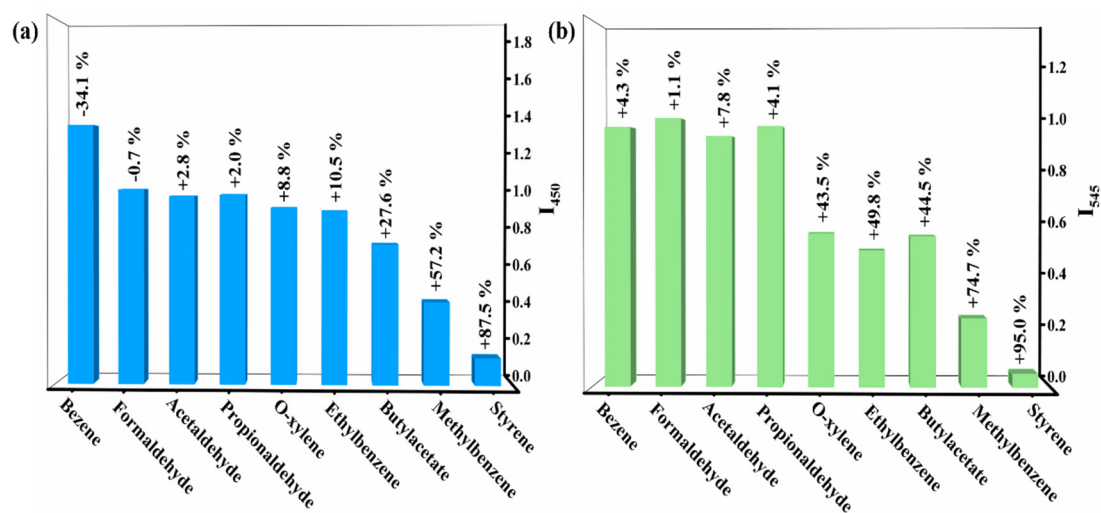

Figure S14 (a) The quenching rates of C460@Tb-MOFs at  $I_{450}$  for different VOCs gases;  
 (b) The quenching rates of C460@Tb-MOFs at  $I_{545}$  for different VOCs gases.

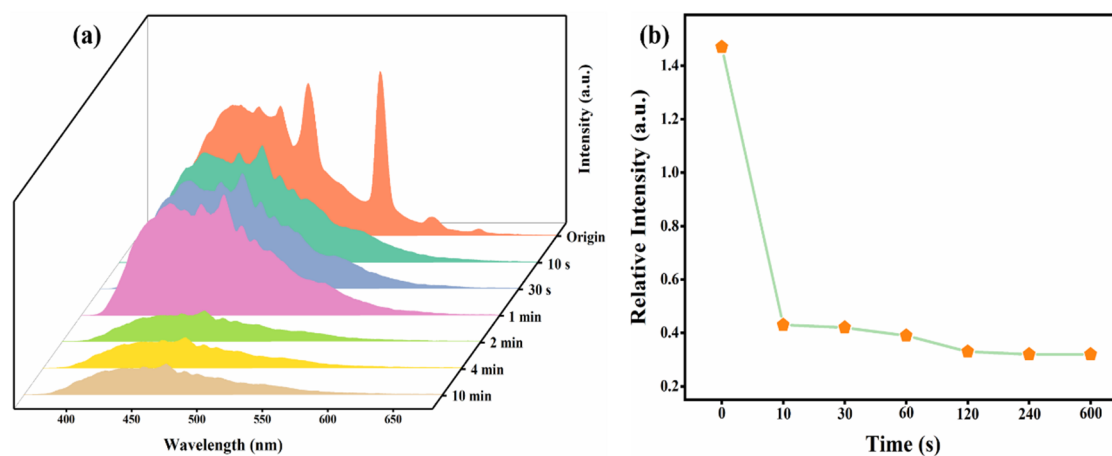

Figure S15 (a) Emission spectra of the time response of C460@Tb-MOFs silica gel plates for the detection of styrene gas; (b) The relative intensity ratio versus time for the detection of styrene gas by C460@Tb-MOFs silica gel plates.



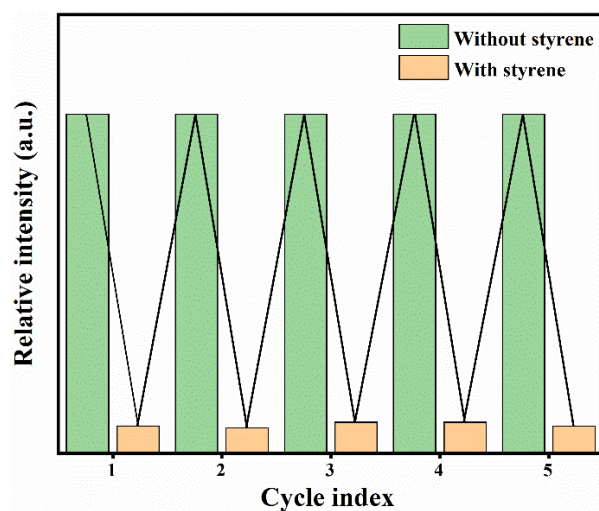

Figure S16 The histogram of relative fluorescence intensity of C460@Tb-MOFs silica gel plate after five cycles of styrene gas detection.
